# Supplementary material for: Comprehensive Identification of Main, Environment Interaction and Epistasis Quantitative Trait Nucleotides for 100-Seed Weight in Soybean (Glycine max (L.) Merr.)
Source: MDPI journal article supplement (doi:10.3390/agronomy14030483), 2024-02-28
Supplement: s1 [file s1]

**Supplement Table S1** Comparison of 23 QTNs with QTLs reported in previous studies

| QTNs found in this study |                            |                                | QTL/QTN has been discovered by predecessors |               |                                            |
|--------------------------|----------------------------|--------------------------------|---------------------------------------------|---------------|--------------------------------------------|
| Name <sup>a</sup>        | Position <sup>b</sup> (bp) | Marker Associated <sup>c</sup> | Position <sup>d</sup> (bp)                  | Linkage group | Reference <sup>e</sup>                     |
| <b>qHSW-2-1</b>          | <b>Gm02_4453462</b>        | <i>BARC-018187-02537</i>       | Gm02:4396906                                | D1b           | Hu, 2013; Chen, 2023                       |
| qHSW-2-2                 | Gm02_5698517               | <i>Glyma.02g059400</i>         | Gm02:5350425-5351746                        | D1b           | Karikari, 2020; Assefa T, 2019             |
| <b>qHSW-3-1</b>          | <b>Gm03_3724705</b>        | <i>qSLW-3-2</i>                | Gm03:1509548-6780840                        | N             | Elattar, 2021                              |
| <b>qHSW-4-1</b>          | <b>Gm04_5395873</b>        | <i>qHSW-4-3</i>                | Gm04:5600501 -8116383                       | C1            | Elattar, 2021                              |
| <b>qHSW-4-2</b>          | <b>Gm04_36981242</b>       | <i>qHSW-4-5</i>                | Gm04:18566056-38979735                      | C1            | Elattar, 2021                              |
| <b>qHSW-5-1</b>          | <b>Gm05_37024496</b>       | <i>Glyma05g32030</i>           | Gm05:37026301-37031440                      | A1            | Elattar, 2021                              |
| qHSW-6-1                 | Gm06_13909376              | <i>BARC-014305-01310</i>       | Gm06:14467413                               | C2.2          | Karikari, 2020; Assefa T, 2019             |
| qHSW-6-3                 | Gm06_48581982              | <i>BARC-028445-05875</i>       | Gm06:48467115                               | C2            | Teng, 2009; Zhang X, 2021                  |
| <b>qHSW-8-1</b>          | <b>Gm08_4692303</b>        | <i>Gm08_4692303</i>            | Gm08:4692303                                | A2            | Karikari, 2020                             |
| <b>qHSW-8-2</b>          | <b>Gm08_14545190</b>       | <i>qHSW-8-3</i>                | Gm08:13630881 -14853570                     | A2            | Elattar, 2021                              |
| <b>qHSW-9-1</b>          | <b>Gm09_4376323</b>        | <i>qPW9-1 / qPW9-4</i>         | Gm09:4444061- 4546963                       | K             | Chen, 2023                                 |
| qHSW-10-1                | Gm10_3962423               | <i>Satt653</i>                 | Gm10:4621018                                | O             | Kato, 2014; Chen, 2023                     |
| qHSW-11-1                | Gm11_10506624              | <i>BARC-028289-05814</i>       | Gm11:10206223                               | B1            | Liang, 2010                                |
| qHSW-13-1                | Gm13_26750464              | <i>BARC-044797-08809</i>       | Gm13:25473455                               | F             | Karikari, 2020; Assefa T,2019              |
| qHSW-13-3                | Gm13_43480280              | <i>BARC-018741-02997</i>       | Gm13:43325422                               | F             | Kulkarni, 2017; Karikari, 2020; Chen, 2023 |
| <b>qHSW-14-1</b>         | <b>Gm14_9347269</b>        | <i>BARC-014309-01312</i>       | Gm14:9434565                                | P             | Wang, 2022                                 |

Supplement Table S1 (Continued)

| QTNs found in this study |                            |                                | QTL/QTN has been discovered by predecessors |               |                              |
|--------------------------|----------------------------|--------------------------------|---------------------------------------------|---------------|------------------------------|
| Name <sup>a</sup>        | Position <sup>b</sup> (bp) | Marker Associated <sup>c</sup> | Position <sup>d</sup> (bp)                  | Linkage group | Reference <sup>e</sup>       |
| <b>qHSW-14-2</b>         | <b>Gm14_40721910</b>       | <i>Gm14_40721910</i>           | Gm14:40721910                               | B2            | Karikari, 2020               |
| <b>qHSW-15-1</b>         | <b>Gm15_47035163</b>       | <i>Gm15_47035163</i>           | Gm15:47035163                               | E             | Karikari, 2020               |
| qHSW-17-1                | Gm17_13658864              | <i>Satt389</i>                 | Gm17:13771477                               | D2            | Kuroda, 2013; Chen, 2023     |
| <b>qHSW-18-1</b>         | <b>Gm18_496658</b>         | <i>qPW18-1</i>                 | Gm18:443148-549035                          | G             | Chen, 2023; Orf, 1999        |
| qHSW-18-2                | Gm18_55491235              | <i>BARC-010491-00654</i>       | Gm18:55007329                               | G             | Mian, 1996                   |
| qHSW-19-1                | Gm19_34854234              | <i>Satt613</i>                 | Gm19:35280772                               | L             | Csanádi, 2001; Elattar, 2021 |
| qHSW-20-1                | Gm20_34264812              | <i>BARC-020713-04700</i>       | Gm20:34052339                               | I             | Kato, 2014; Chen, 2023       |

Note: The bold QTNs is located less than 100kb from the physical positions of previously discovered marker. <sup>a</sup>: QTNs detected in the study following the nomenclature of McCouch et al. (1997). <sup>b</sup>: Including Glycine max (Gm), chromosome number, underscore and the position of the QTN. <sup>c</sup>: The name of marker/QTN discovered by predecessors. <sup>d</sup>: the position of marker/QTN discovered by predecessors. <sup>e</sup>: The references fromt SoyBase (www.soybase.org) and other GWAS-related studies.

## References

- Assefa, T.; Otyama, P.I.; Brown, A.V.; Brown, A.V.; Kalberer, S.R.; Kulkarni, R.S.; Cannon, S.B. Genome-wide associations and epistatic interactions for internode number, plant height, seed weight and seed yield in soybean. *BMC Genom.* **2019**, 20: 257. <https://doi.org/10.1186/s12864-019-5907-7>.
- Csanádi, G.Y.; Vollmann, J.; Stift, G.; Lelley, T. Seed quality QTLs identified in a molecular map of early maturing soybean. *Theor. Appl. Genet.* **2001**, 103, 912-919. <https://doi.org/10.1007/s001220100621>.
- Chen, Y.J.; Xiong, Y.J.; Hong, H.L.; Li, G.; Gao, J.; Guo, Q.Y.; Sun, R.J.; Ren, H.L.; Zhang, F.; Wang, J.; Song, J.; Qiu, L.J. Genetic dissection and genomic selection for seed weight, pod length, and pod width in soybean. *Crop. J.* **2023**, 11(3), 832-841. <https://doi.org/10.1016/j.cj.2022.11.006>

- Elattar, M.A.; Karikari, B.; Li, S.G.; Song, S.Y.; Cao, Y.C.; Aslam, M.; Hina, A.; Abou-Elwafa, S.F.; Zhao, T.J. Identification and validation of major QTLs, epistatic interactions, and candidate genes for soybean seed shape and weight using two related RIL populations. *Front. Genet.* **2021**, *12*, 666440. <https://doi.org/10.3389/fgene.2021.666440>
- Hu, Z.B.; Zhang, H.R.; Kan, G.Z.; Ma, D.Y.; Zhang, D.; Shi, G.X.; Hong, E.L.; Zhang, G.Z.; Yu, D.Y. Determination of the genetic architecture of seed size and shape via linkage and association analysis in soybean (*Glycine max* L. Merr.). *Genetica* **2013**, *141*, 247-254. <https://doi.org/10.1007/s10709-013-9723-8>.
- Karikari, B.; Wang, Z.L.; Zhou Y.L.; Yan, W.L.; Feng, J.Y.; Zhao, T.J. Identification of quantitative trait nucleotides and candidate genes for soybean seed weight by multiple models of genome-wide association study. *BMC Plant Biol.* **2020**, *20*, 1-14. <https://doi.org/10.1186/s12870-020-02604-z>.
- Kato, S.; Sayama, T.; Fujii, K.; Yumoto, S.; Kono, Y.; Hwang, T.; Kikuchi, A.; Takada, Y.; Tanaka, Y.; Shiraiwa, T.; Ishimoto, M. A major and stable QTL associated with seed weight in soybean across multiple environments and genetic backgrounds. *Theor. Appl. Genet.* **2014**, *127*, 1365-1374. <https://doi.org/10.1007/s00122-014-2304-0>.
- Kulkarni, K.P.; Asekova, S.; Lee, D.H.; Bilyeu, K.; Song, J.T.; Lee, J. Mapping QTLs for 100-seed weight in an interspecific soybean cross of Williams 82 (*Glycine max*) and PI 366121 (*Glycine soja*). *Crop Pasture Sci.* **2017**, *68*(2), 148-155. <https://doi.org/10.1071/CP16246>.
- Kuroda Y.; Kaga A.; Tomooka N.; Yano, H.; Takada, T.; Kato, S.; Vaughan, D. QTL affecting fitness of hybrids between wild and cultivated soybeans in experimental fields. *Ecol. Evol.* **2013**, *3*(7), 2150-2168. <https://doi.org/10.1002/ece3.606>.
- Liang, Q.; Cheng, X.H.; Mei, M.T.; Yan, X.L.; Liao, H. QTL analysis of root traits as related to phosphorus efficiency in soybean. *Annals of Botany* **2010**, *106*, 223-234. <https://doi.org/10.1093/aob/mcq097>.
- McCouch, S.R.; Chen, X.; Panaud, O.; Temnykh, S.; Xu, Y.; Yong, G.C.; Huang, N.; Ishii, T.; Blair, M. Microsatellite marker development, mapping and applications in rice genetics and breeding. *Plant Mole. Biol.* **1997**, *35*(1-2), 89-99. <https://doi.org/10.1023/A:1005711431474>.
- Orf, J.H.; Chase, K.; Jarvik, T.; Mansur, L.M.; Cregan, P.B.; Adler, F.R.; Lark, K.G. Genetics of soybean agronomic traits: I. Comparison of three related recombinant inbred populations. *Crop. Sci.* **1999**, *39*(6), 1642-1651. <https://doi.org/10.2135/cropsci1999.3961642x>.
- Mian, M.A.R.; Bailey, M.A.; Tamulonis, J.P.; Shipe, E.R.; Carter Jr. T.E.; Parrott, W.A.; Ashley, D.A.; Hussey, R.S.; Boerma, H. R. Molecular markers associated with seed weight in two soybean populations. *Theor. Appl. Genet.* **1996**, *93*, 1011-1016. <https://doi.org/10.1007/BF00230118>.
- Teng, W.; Han, Y.; Du, Y.; Sun, D.; Zhang, Z.; Qiu, L.; Sun, G.; Li, W. QTL analyses of seed weight during the development of soybean (*Glycine max* L. Merr.). *Heredity* **2009**, *102*(4), 372-380. <https://doi.org/10.1038/hdy.2008.108>.
- Wang, J.; Zhang, Y.W.; Jiao, Z.J.; Liu, P.P.; Chang, W. Identification of QTLs and candidate genes for 100-seed weight trait using PyBSASeq algorithm in soybean. *Acta Agron. Sinica* **2022**, *(48)*03, 635-643. <https://doi.org/10.3724/SP.J.1006.2022.14008>.
- Zhang, X.L.; Ding, W.T.; Xue, D.; Li, X.N.; Zhou, Y.; Shen, J.C.; Feng, J.Y.; Guo, N.; Qiu, L.J.; Xing H.; Zhao, J.M. Genome-wide association studies of plant architecture-related traits and 100-seed weight in soybean landraces. *BMC GENOMIC DATA* **2021**, *22*, 10-24. <https://doi.org/10.1186/s12863-021-00964-5>.
